# Supplementary material for: Maternal intake of high n-6 polyunsaturated fatty acid diet during pregnancy causes transgenerational increase in mammary cancer risk in mice
Source: Springer Nature journal article supplement (doi:10.1186/s13058-017-0866-x), 2017-07-03
Supplement: MOESM3 [file 12672980]

**A. F1 CON Tumor Histopathology**

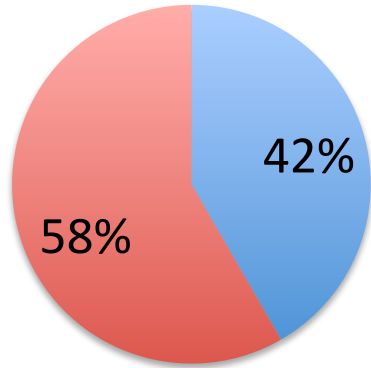

**F3 CON Tumor Histopathology**

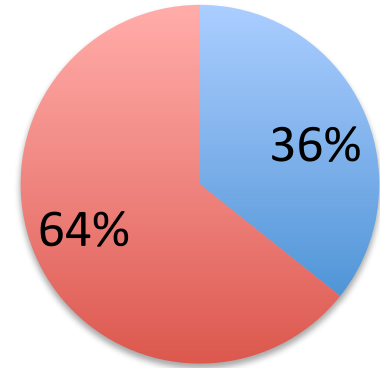

■ Benign  
■ Malignant

**B. F1 HF Tumor Histopathology**

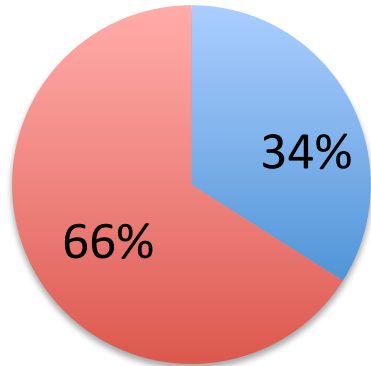

**F3 HF Tumor Histopathology**

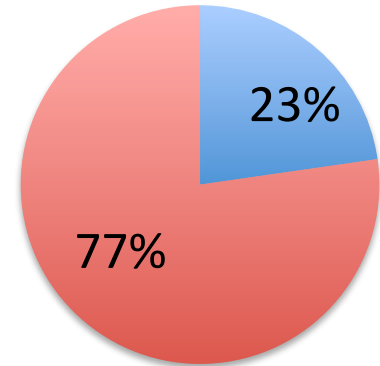

■ Benign  
■ Malignant
