# Supplementary material for: Maternal intake of high n-6 polyunsaturated fatty acid diet during pregnancy causes transgenerational increase in mammary cancer risk in mice
Source: Springer Nature journal article supplement (doi:10.1186/s13058-017-0866-x), 2017-07-03

**A.****WT F1 Tumor Multiplicity**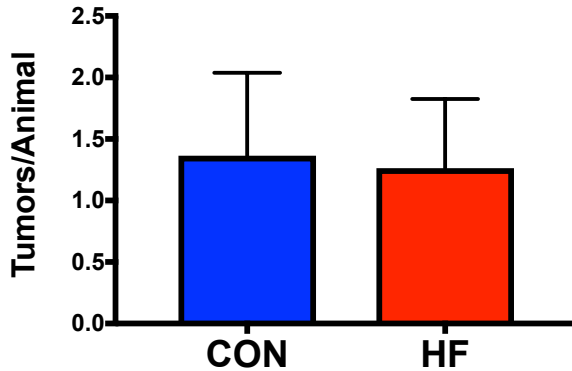**B.****WT F3 Tumor Multiplicity**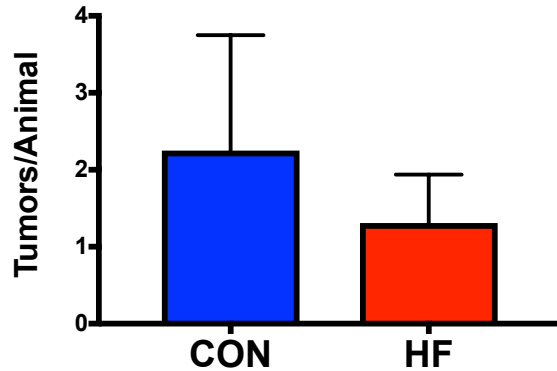

Supplement: MOESM4 [file 12672980]
